# Supplementary material for: 3′-UTR Polymorphisms of MTHFR and TS Associated with Osteoporotic Vertebral Compression Fracture Susceptibility in Postmenopausal Women
Source: PubMed Central journal article supplement (PMC5877685; doi:10.3390/ijms19030824), 2018-03-12
Supplement: ijms-19-00824-s001.pdf [file ijms-19-00824-s001.pdf]

**Supplementary Table 1.** Genotype frequencies of *MTHFR* and *TS* genes polymorphisms in osteoporosis by chi-square test.

| Genotypes               | Control<br>(n=158) | Case<br>(n=143) | OR (95% CI)         | <i>P</i> <sup>1</sup> | OVCF<br>(n=74) | OR (95% CI)         | <i>P</i> <sup>2</sup> | non-OVCF<br>(n=69) | OR (95% CI)         | <i>P</i> <sup>3</sup> |
|-------------------------|--------------------|-----------------|---------------------|-----------------------|----------------|---------------------|-----------------------|--------------------|---------------------|-----------------------|
| <i>MTHFR</i> 2572C>A    |                    |                 |                     |                       |                |                     |                       |                    |                     |                       |
| CC                      | 103 (65.2)         | 111 (77.6)      | 1.000 (reference)   |                       | 62 (83.8)      | 1.000 (reference)   |                       | 49 (71.0)          | 1.000 (reference)   |                       |
| CA                      | 52 (32.9)          | 29 (20.3)       | 0.518 (0.305-0.877) | 0.013                 | 11 (14.9)      | 0.351 (0.171-0.724) | 0.003                 | 18 (26.1)          | 0.728 (0.386-1.373) | 0.326                 |
| AA                      | 3 (1.9)            | 3 (2.1)         | 0.928 (0.183-4.701) | 0.928                 | 1 (1.4)        | 0.554 (0.056-5.441) | 0.597                 | 2 (2.9)            | 1.401 (0.227-8.660) | 0.720                 |
| Dominant (CC vs CA+AA)  |                    |                 | 0.540 (0.324-0.901) | 0.017                 |                | 0.363 (0.180-0.730) | 0.003                 |                    | 0.764 (0.414-1.413) | 0.388                 |
| Recessive (CC+CA vs AA) |                    |                 | 1.107 (0.220-5.575) | 0.902                 |                | 0.708 (0.072-6.921) | 0.760                 |                    | 1.542 (0.252-9.443) | 0.645                 |
| HWE- <i>P</i>           | 0.288              | 0.885           |                     |                       |                |                     |                       |                    |                     |                       |
| <i>MTHFR</i> 4869C>G    |                    |                 |                     |                       |                |                     |                       |                    |                     |                       |
| CC                      | 135 (85.4)         | 132 (92.3)      | 1.000 (reference)   |                       | 68 (91.9)      | 1.000 (reference)   |                       | 64 (92.8)          | 1.000 (reference)   |                       |
| CG                      | 23 (14.6)          | 11 (7.7)        | 0.489 (0.229-1.043) | 0.057                 | 6 (8.1)        | 0.518 (0.201-1.332) | 0.152                 | 5 (7.2)            | 0.459 (0.167-1.261) | 0.108                 |
| GG                      | 0 (0.0)            | 0 (0.0)         | N/A                 | N/A                   | 0 (0.0)        | N/A                 | N/A                   | 0 (0.0)            | N/A                 | N/A                   |
| Dominant (CC vs CG+GG)  |                    |                 | 0.489 (0.229-1.043) | 0.057                 |                | 0.518 (0.201-1.332) | 0.152                 |                    | 0.459 (0.167-1.261) | 0.108                 |
| Recessive (CC+CG vs GG) |                    |                 | N/A                 | N/A                   |                | N/A                 | N/A                   |                    | N/A                 | N/A                   |
| HWE- <i>P</i>           | 0.324              | 0.632           |                     |                       |                |                     |                       |                    |                     |                       |
| <i>TS</i> 1100C>T       |                    |                 |                     |                       |                |                     |                       |                    |                     |                       |
| CC                      | 92 (58.2)          | 95 (66.4)       | 1.000 (reference)   |                       | 56 (75.7)      | 1.000 (reference)   |                       | 39 (56.5)          | 1.000 (reference)   |                       |
| CT                      | 58 (36.7)          | 40 (28.0)       | 0.668 (0.407-1.095) | 0.108                 | 17 (23.0)      | 0.482 (0.255-0.908) | 0.024                 | 23 (33.3)          | 0.936 (0.508-1.724) | 0.830                 |
| TT                      | 8 (5.1)            | 8 (5.6)         | 0.968 (0.349-2.689) | 0.951                 | 1 (1.4)        | 0.205 (0.025-1.686) | 0.078                 | 7 (10.1)           | 2.064 (0.700-6.086) | 0.195                 |
| Dominant (CC vs CT+TT)  |                    |                 | 0.704 (0.440-1.126) | 0.142                 |                | 0.448 (0.242-0.831) | 0.009                 |                    | 1.072 (0.606-1.899) | 0.811                 |
| Recessive (CC+CT vs TT) |                    |                 | 1.111 (0.406-3.042) | 0.838                 |                | 0.257 (0.032-2.093) | 0.136                 |                    | 2.117 (0.736-6.090) | 0.171                 |
| HWE- <i>P</i>           | 0.497              | 0.280           |                     |                       |                |                     |                       |                    |                     |                       |
| <i>TS</i> 1170A>G       |                    |                 |                     |                       |                |                     |                       |                    |                     |                       |
| AA                      | 64 (40.5)          | 104 (72.7)      | 1.000 (reference)   |                       | 48 (64.9)      | 1.000 (reference)   |                       | 56 (81.2)          | 1.000 (reference)   |                       |
| AG                      | 76 (48.1)          | 34 (23.8)       | 0.275 (0.165-0.459) | < 0.0001              | 24 (32.4)      | 0.421 (0.233-0.761) | 0.004                 | 10 (14.5)          | 0.150 (0.071-0.319) | < 0.0001              |
| GG                      | 18 (11.4)          | 5 (3.5)         | 0.171 (0.061-0.483) | 0.000                 | 2 (2.7)        | 0.148 (0.033-0.669) | 0.002                 | 3 (4.3)            | 0.191 (0.053-0.681) | 0.003                 |
| Dominant (AA vs AG+GG)  |                    |                 | 0.255 (0.157-0.415) | < 0.0001              |                | 0.369 (0.208-0.654) | 0.001                 |                    | 0.158 (0.080-0.313) | < 0.0001              |
| Recessive (AA+AG vs GG) |                    |                 | 0.282 (0.102-0.780) | 0.008                 |                | 0.216 (0.049-0.957) | 0.016                 |                    | 0.354 (0.101-1.242) | 0.073                 |
| HWE- <i>P</i>           | 0.520              | 0.267           |                     |                       |                |                     |                       |                    |                     |                       |

Abbreviation; HTN, hypertension; DM, diabetes mellitus; HWE, Hardy-Weinberg equilibrium.

<sup>1</sup> *P*-value was compared between osteoporosis and control groups.

<sup>2</sup> *P*-value was compared between OVCF and control groups.

<sup>3</sup> *P*-value was compared between non-OVCF and control groups.

**Supplementary Table 2.** Statistical powers of genetic associations in the present case-control study

| <b>Characteristics</b>           | <b>Association</b> | <b>OR adjusted age, HTN, DM (95% CI)</b> | <b>Statistical power (%)</b> |
|----------------------------------|--------------------|------------------------------------------|------------------------------|
| <i>MTHFR</i> 2572CA              | Total osteoporosis | 0.494 (0.285-0.857)                      | 70.40%                       |
| <i>MTHFR</i> 2572 dominant model | Total osteoporosis | 0.516 (0.303-0.880)                      | 63.94%                       |
| <i>MTHFR</i> 2572CA              | OVCF               | 0.382 (0.179-0.813)                      | 84.80%                       |
| <i>MTHFR</i> 2572 dominant model | OVCF               | 0.397 (0.191-0.825)                      | 68.60%                       |
| <i>TS</i> 1100CT                 | OVCF               | 0.492 (0.252-0.961)                      | 61.33%                       |
| <i>TS</i> 1100 recessive model   | OVCF               | 0.462 (0.241-0.886)                      | 12.45%                       |
| <i>TS</i> 1170AG                 | Total osteoporosis | 0.276 (0.165-0.460)                      | 99.93%                       |
| <i>TS</i> 1170GG                 | Total osteoporosis | 0.168 (0.059-0.475)                      | 95.25%                       |
| <i>TS</i> 1170 dominant model    | Total osteoporosis | 0.255 (0.157-0.415)                      | 99.99%                       |
| <i>TS</i> 1170 recessive model   | Total osteoporosis | 0.281 (0.101-0.778)                      | 73.32%                       |
| <i>TS</i> 1170AG                 | OVCF               | 0.413 (0.221-0.774)                      | 80.79%                       |
| <i>TS</i> 1170GG                 | OVCF               | 0.086 (0.011-0.672)                      | 84.03%                       |
| <i>TS</i> 1170 dominant model    | OVCF               | 0.354 (0.192-0.653)                      | 93.48%                       |
| <i>TS</i> 1170 recessive model   | OVCF               | 0.129 (0.017-0.994)                      | 61.40%                       |
| <i>TS</i> 1170AG                 | non-OVCF           | 0.147 (0.068-0.320)                      | 99.99%                       |
| <i>TS</i> 1170GG                 | non-OVCF           | 0.137 (0.035-0.527)                      | 81.68%                       |
| <i>TS</i> 1170 dominant model    | non-OVCF           | 0.146 (0.072-0.298)                      | 99.99%                       |

**Abbreviations:** OVCF, osteoporotic vertebral compression fracture; HTN, hypertension; DM, diabetes mellitus.
